## CORRESPONDENCE

Anesthesiology

1999; 90:918

© 1999 American Society of Anesthesiologists, Inc.

Lippincott Williams & Wilkins, Inc.

### Preventing Complications during Percutaneous Tracheostomy

*To the Editor:*—Mphanza *et al.*<sup>1</sup> described a problem encountered during percutaneous dilational tracheostomy. The problem was thought to occur because the wire guide had been threaded through the Murphy eye of the endotracheal tube, preventing successful passage of the 8-French catheter guide.

Since Ciaglia *et al.*<sup>2</sup> first described the technique of percutaneous tracheostomy in 1985, it has been noted that many of the possible complications were primarily caused by the blind nature of the procedure.<sup>3</sup> This has led to the common practice of passing a fiberoptic scope down the endotracheal tube before passing the needle into the trachea. This not only allows visualization of the needle and subsequent guide wire passage, but it also serves as a safeguard as the tube is pulled back during the procedure. Carillo *et al.*<sup>4</sup> described their experiences with a series of 35 patients in which 33 of the procedures were accomplished with bronchoscopic guidance. They observed no significant complications and documented a significant savings with the bedside procedure. Although Berrouschot *et al.*<sup>5</sup> reported comparable rates of complications between "blind" versus bronchoscopic-aided percutaneous tracheostomies, the complications were more severe in the blind group.

Thus far, the only disadvantage of the bronchoscopic portion has been the potential for increased intracranial pressure. Carillo *et al.*<sup>4</sup> noted increased intracranial pressure in one of their patients. Reilly *et al.*<sup>6</sup> compared three methods of tracheostomy: percutaneous endoscopic, percutaneous Doppler, and standard surgical technique. In some patients the endoscopic technique resulted in significant hypercapnia and an increase of intracranial pressure to unacceptable levels.<sup>6</sup>

The addition of fiberoptic bronchoscopy to the percutaneous dilational tracheostomy procedure does not guarantee 100% success of elimination of all complications, but certainly could have prevented the problem encountered by Mphanza *et al.*<sup>1</sup> Percutaneous dilational tracheostomy can be accomplished with relatively low risk in a blind technique. However, the procedure has been shown to be safer with the assistance of bronchoscopic guidance and should be undertaken in that manner whenever it is not otherwise contraindicated.

**Michael Bouvette, M.D.**

Resident in Anesthesiology

**Thomas M. Fuhrman, M.D., F.C.C.M., F.C.C.P.**

Associate Professor of Anesthesiology

University of Louisville

Louisville, Kentucky 40202-3617

tmfuhr01@ulkyvm.louisville.edu

### References

1. Mphanza T, Jacobs S, Chavez M: A potential complication associated with percutaneous tracheostomy with an endotracheal tube with a Murphy eye *in situ*. *ANESTHESIOLOGY* 1998; 88:1418
2. Ciaglia P, Firsching R, Syniec C: Elective percutaneous dilational tracheostomy: A new and simple bedside procedure; preliminary report. *Chest* 1985; 87:715-9
3. Marelli D, Paul A, Manolidis S, Walsh G, Odum JN, Burdon TA, Shennib H, Vestweber KH, Fleischer DM, Mulder DS: Endoscopic guided percutaneous tracheostomy: Early results of a consecutive trial. *J Trauma* 1990; 30:433-5
4. Carrillo EH, Spain DA, Bumpous JM, Schmieg RE, Miller FB, Richardson JD: Percutaneous dilational tracheostomy for airway control. *Am J Surg* 1007; 174:469-73
5. Berrouschot J, Oeken J, Steinger L, Schneider D: Perioperative complications of percutaneous dilational tracheostomy. *Laryngoscope* 1997; 107:1538-44
6. Reilly PM, Sing RF, Giberson FA, Anderson HL 3rd, Rotondo MF, Tinkoff GH, Schwab CW: Hypercarbia during tracheostomy: A comparison of percutaneous endoscopic, percutaneous Doppler, and standard surgical tracheostomy. *Intensive Care Med* 1997; 23(8):859-64

(Accepted for publication October 12, 1998.)

Anesthesiology

1999; 90:918-9

© 1999 American Society of Anesthesiologists, Inc.

Lippincott Williams & Wilkins, Inc.

*In Reply:*—Thank you for giving us the opportunity to respond to Drs. Fuhrman and Bouvette. We agree with them in principle that simultaneous bronchoscopic monitoring in our reported case would most likely have prevented the problem.

In comparing groups with and without bronchoscopy, Berrouschot *et al.*<sup>1</sup> found no difference in the rate of perioperative complications; however, there were more severe complications in the group without bronchoscopy. Although invaluable to percutaneous dilational tracheostomy, bronchoscopic guidance is of special value for patients with abnormal or poorly felt surface anatomy. Percutaneous dilational tracheostomy in our

intensive care unit is performed as described by Ciaglia<sup>2</sup> and is only performed by experienced consultant anesthesiologists. We do not routinely pass a fiberoptic scope down the endotracheal tube before puncturing the trachea in all our percutaneous dilational tracheostomies. Typically we have a consultant anesthesiologist performing the procedure and a senior resident providing anesthesia and minding the airway. Fiberoptic bronchoscopic proficiency varies among our residents; therefore, to have bronchoscopic monitoring would require the presence of an extra consultant anesthesiologist. We have found that bronchoscopic monitoring makes ventilation more difficult because of the reduced gas flow though



## CORRESPONDENCE

the endotracheal tube because of the presence of the fiberoptic scope. Increasing the fractional inspired oxygen tension ( $Fi_{O_2}$ ) to 1 can compensate for oxygenation but hypercapnia remains a problem. Patient selection is vital, we refer obese patients and those with abnormal anatomy to the head and neck surgeons for an open procedure.

Our complication rate is similar to that quoted in the literature,<sup>1,3,4</sup> and so far we have had only minor complications. Bronchoscopic guidance may prevent complications such as the one we reported; we are currently reviewing our practice to incorporate simultaneous bronchoscopic monitoring.

**Thomas Mphanza, F.R.C.A.**

Consultant Anaesthetist

**Sydney Jacobs, F.R.C.A., F.A.N.Z.C.A.**

Director of Adult Intensive Care Unit

Department of Anaesthesia

Riyadh Military Hospital

Riyadh 11159, Kingdom of Saudi Arabia

gumete@surgical.net

Anesthesiology  
1999; 90:919-20

© 1999 American Society of Anesthesiologists, Inc.  
Lippincott Williams & Wilkins, Inc.

## Vascular Effects of Isoflurane: No Inconsistency between Data

*To the Editor:*—We read with interest the article by Zhou *et al.*<sup>1</sup> entitled "Isoflurane-induced dilation of porcine coronary arterioles is mediated by adenosine 5'triphosphate-sensitive potassium channels" recently published in ANESTHESIOLOGY. The authors used a unique *in vitro* microvessel imaging system that allows the investigation of isolated microvessels apart from confounding variables related to the surrounding myocardium and in the absence of shear forces, blood flow, and circulating vasoactive substances. The authors observed that microvessels averaging  $172 \pm 51 \mu\text{m}$  (SD) in diameter that were precontracted with either acetylcholine or the thromboxane analog U46619 relaxed by a mean of 25% of the vessel diameter. This relaxation was partly inhibited in the presence of the ATP-sensitive potassium channel blocker glibenclamide. The authors concluded appropriately that isoflurane dilates isolated precontracted, porcine coronary arterioles *in vitro* in a manner similar to that observed in studies *in vivo*. However, the authors claim that the findings are in conflict with those of Park *et al.*<sup>2-4</sup> Park *et al.* reported that isolated coronary microvessels from the rat,<sup>3</sup> rabbit,<sup>2</sup> and, to a lesser extent, the pig,<sup>4</sup> contract slightly in response to isoflurane. However, there are several differences between the study by Zhou *et al.*<sup>1</sup> and those of Park *et al.* First, vessels in the studies by Park *et al.*<sup>2-4</sup> only contracted when the vessels were studied in a noncontracted or a predilated state.<sup>2-4</sup> Contraction was never observed when vessels were precontracted.

Secondly, a markedly heterogeneous sensitivity of isolated microvessels to the effects of isoflurane was observed in vessels from the rat and rabbit. Park *et al.*<sup>2,3</sup> found that the smaller the coronary vessel (e.g.,  $<100 \mu\text{m}$ ), the greater the observed contractile response. Microvessels greater than  $260 \mu\text{m}$  dilated potently in response to isoflurane, even when precontracted.<sup>3</sup> Because the vessels in the study by Zhou *et al.*<sup>1</sup> averaged  $172 \mu\text{m}$  in diameter, these differences could be explained in part by the differ-

## References

1. Berrouschot J, Oeken J, Steiniger L, Schneider D: Perioperative complications of percutaneous dilational tracheostomy. *Laryngoscope* 1997; 107:1538-44
2. Ciaglia P, Firsching R, Petty TL: Elective percutaneous dilational tracheostomy. *Chest* 1987; 87:715-9
3. Marelli D, Paul A, Manolidis S, Walsh G, Odum JN, Burdon TA, Shennib H, Vestwebber KH, Fleischer DM, Mulder DS: Endoscopic guided percutaneous dilational tracheostomy: Early results of a consecutive trial. *J Trauma* 1990; 30(4):433-5
4. Toye FJ, Weinstein JD: Clinical experience with percutaneous tracheostomy and cricothyrotomy in 100 patients. *J Trauma* 1986; 26:1034-40

(Accepted for publication October 12, 1998.)

ences in vessel size. Zhou *et al.*<sup>1</sup> commented in the discussion that one explanation for the perceived discrepancy between the studies may be caused by the rate of administration of isoflurane. Acute administration of isoflurane causes greater relaxation than if isoflurane is given slowly and long-term. This is a very good point and may in part explain the differences between the findings of the two laboratories. However, the other factors need to be addressed. We believe that the study recently published by Zhou *et al.*<sup>1</sup> is very informative, well executed, and complimentary with those of Park *et al.*<sup>2-4</sup> There is no inconsistency between the data obtained by the two groups of investigators. Park *et al.*<sup>2-4</sup> never stated that isoflurane is not a potent vasodilator of coronary arteries. They only claimed that isoflurane causes a heterogeneous response of coronary microvessels, with larger microvessels dilating more potently than smaller vessels, and that the response is largely dependent on the preexisting tone of the vessels, as it is with most other vasodilators. We appreciate your attention to this matter.

**Frank W. Sellke, M.D.**

**Kyung W. Park, M.D.**

**Edward Lowenstein, M.D.**

Beth Israel Deaconess Medical Center  
Boston, Massachusetts 02215

fsellke@bidmc.harvard.edu

## References

1. Zhou X, Abboud W, Manabat NC, Salem MR, Crystal GJ: Isoflurane-induced dilation of porcine coronary arterioles is mediated by ATP-sensitive potassium channels. *ANESTHESIOLOGY* 1998; 89: 182-9
